# Supplementary material
Source: PubMed Central journal article supplement (PMC3010241)
Supplement: NIHMS255093-supplement-supplementary.pdf [file NIHMS255093-supplement-supplementary.pdf]

## Supplementary Table 1

**Supplemental Table 1: ICP-MS analysis of yeast grown in low metal SC media<sup>1</sup>**

| <b>Element</b> | <b>WT (mM)</b> | <b><i>pho80</i>Δ (mM)</b> |
|----------------|----------------|---------------------------|
| <b>P</b>       | 220.1 ± 11.3   | 328.5 ± 2.1               |
| <b>Ca</b>      | 4.3 ± 0.3      | 8.2 ± 0.5                 |
| <b>Fe</b>      | 0.123 ± 0.01   | 0.146 ± 0.01              |

Analysis of two independent cultures ± S.D.

<sup>1</sup> Prepared with a specialized yeast nitrogen base without Ca, Cu, Fe, Mg, Mn and Zn (Bio101, Inc; Vista CA) supplemented with 10 μM MgSO<sub>4</sub> and 30 μM CaCl<sub>2</sub>.

---

## Supplementary Figure 1

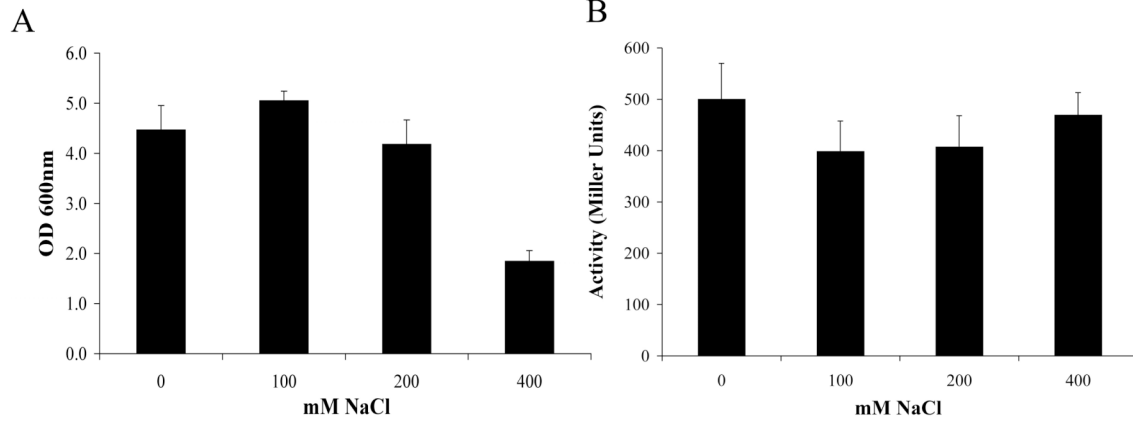

### Supplementary Figure 1: LacZ reporter assays for iron transport transcription with NaCl stress

Wild type (BY4741) cells transformed with the *AFT-CYC* reporter for the Aft1p response were grown in selecting minimal media overnight for 18 hours supplemented with the indicated concentrations of NaCl. (A) Total cell growth was monitored as a function of absorbance at 600 nm. (B) LacZ measurements were conducted as described in *Materials and Methods*. Error bars indicate S.D.
